# Supplementary material
Source: Research Square preprint supplement (doi:10.21203/rs.3.rs-10145890/v1)
Supplement: Supplementary file 1 [file 1b167f049147d46f670a86d5.docx]

Questionnaire Guide used in the study

* Indicates required question

1. Age (in years)*

2. Gender*

*Mark only one oval.*

- Male
- Female
- Others

3. Educational status*

*Mark only one oval.*

- Illiterate
- Primary school
- Middle school
- High School
- Pre-university
- Degree/Diploma
- Graduate
- Post Graduate

4.Occupational status*

*Mark only one oval.*

- Employed
- Unemployed

5. Place of residence*

*Mark only one oval.*

- Urban
- Rural

6. Habits (Move to next question if none)

*Check all that apply.*

- Tobacco use (Smoking, chewing, etc.)
- Alcoholism
- Other:

7. Co-morbidities (move to next if none)

*Check all that apply.*

- Diabetes (Sugar)
- Hypertension (high BP)
- Osteo-arthritis
- Migraine
- Ischemic heart disease
- Hyperlipidaemia (high Cholesterol)

8. Have you used pain medications in the last 1 year?*

*Mark only one oval.*

- Yes
- No

9. Commonly used pain medication by you(select all that is applicable)*

*Check all that apply.*

- Paracetamol
- Aspirin/Disprin
- Diclofenac
- Naproxen
- Pregabalin/gabapentin
- Combination drugs (eg. aceclo para)
- Ibuprofen

10. Frequency of pain medication usage*

*Mark only one oval.*

- Regular (at least 3 times a week in the last 3 months)
- Irregular/Occasional

11. Most of the time, how do you procure pain medication?*

*Mark only one oval.*

- Prescription by a medical practitioner
- Pharmacist suggestion
- Self-medication with pain medication procured over the counter
- Suggested or given by a friend/relative
- Other:

12. Most common indication for which pain medication was used by you (Select all that is applicable)*

*Check all that apply.*

- Fever
- Headache
- Muscle Sprain/Strain
- Joint pains
- Toothache
- Abdominal pain
- Menstrual pain

13. Common/long term adverse drug reaction for pain medication that you are aware of (select all that is applicable)*

*Check all that apply.*

- Nausea/Vomiting
- Gastritis
- Pain abdomen
- Rashes
- Organ damage(Kidney, Liver, Cardiac)
